# Supplementary material
Source: PubMed Central journal article supplement (PMC4407211)
Supplement: AEM.03941-14_zam999116261so1.pdf [file AEM.03941-14_zam999116261so1.pdf]

## Supplementary material

**Table S1**

| Sample | OTUs | Chao1  | Shannon | ESC  | Sample | OTUs | Chao1  | Shannon | ESC  |
|--------|------|--------|---------|------|--------|------|--------|---------|------|
| EP.1   | 51   | 64.75  | 3.36    | 100% | Swab4  | 140  | 222.33 | 3.95    | 99%  |
| EP.2   | 102  | 156.38 | 3.73    | 99%  | Swab5  | 87   | 128.05 | 1.63    | 99%  |
| EP.3   | 99   | 107.75 | 3.21    | 100% | Swab6  | 114  | 153.05 | 2.22    | 99%  |
| EP.4   | 72   | 91.25  | 2.94    | 99%  | Swab7  | 278  | 316.17 | 6.34    | 95%  |
| EP.5   | 67   | 98.07  | 3.13    | 96%  | Swab8  | 232  | 288.27 | 5.62    | 97%  |
| EP.6   | 87   | 91.71  | 4.17    | 100% | Swab9  | 85   | 120.20 | 1.61    | 99%  |
| I.1    | 46   | 79.00  | 4.09    | 92%  | Swab10 | 281  | 377.18 | 4.79    | 99%  |
| I.5    | 46   | 84.50  | 4.16    | 93%  | Swab11 | 185  | 280.69 | 2.47    | 99%  |
| I.8    | 51   | 77.25  | 4.17    | 95%  | Swab12 | 193  | 240.84 | 4.98    | 98%  |
| I.10   | 16   | 19.75  | 2.98    | 92%  | Swab13 | 64   | 112.00 | 4.42    | 89%  |
| I.11   | 19   | 34.00  | 2.77    | 89%  | Swab14 | 207  | 268.92 | 3.53    | 99%  |
| I.13   | 109  | 121.65 | 4.35    | 99%  | Swab15 | 221  | 258.24 | 4.76    | 98%  |
| I.17   | 72   | 107.00 | 5.14    | 86%  | Swab16 | 260  | 315.12 | 4.94    | 99%  |
| I.18   | 156  | 174.13 | 4.61    | 100% | Swab17 | 135  | 143.56 | 3.57    | 100% |
| I.20   | 42   | 46.50  | 1.93    | 100% | Swab18 | 170  | 215.04 | 4.87    | 99%  |
| II.1   | 63   | 94.50  | 2.96    | 96%  | Swab19 | 274  | 388.00 | 5.47    | 98%  |
| II.2   | 121  | 150.75 | 3.17    | 99%  | Swab20 | 124  | 176.11 | 2.67    | 99%  |
| II.5   | 90   | 119.33 | 5.55    | 93%  | Swab21 | 91   | 177.13 | 2.49    | 96%  |
| II.9   | 79   | 117.15 | 4.85    | 93%  | Water1 | 156  | 221.56 | 3.47    | 99%  |
| II.10  | 8    | 29.00  | 2.85    | 30%  | Water2 | 331  | 371.64 | 5.78    | 99%  |
| II.11  | 35   | 42.20  | 1.36    | 100% | Water3 | 160  | 168.40 | 4.92    | 100% |
| II.14  | 40   | 49.75  | 1.76    | 99%  | Water4 | 239  | 310.20 | 5.90    | 96%  |
| II.18  | 78   | 92.53  | 2.67    | 100% | Water5 | 231  | 288.50 | 5.51    | 98%  |
| Swab3  | 239  | 312.35 | 4.13    | 98%  | Water6 | 299  | 312.68 | 5.79    | 99%  |

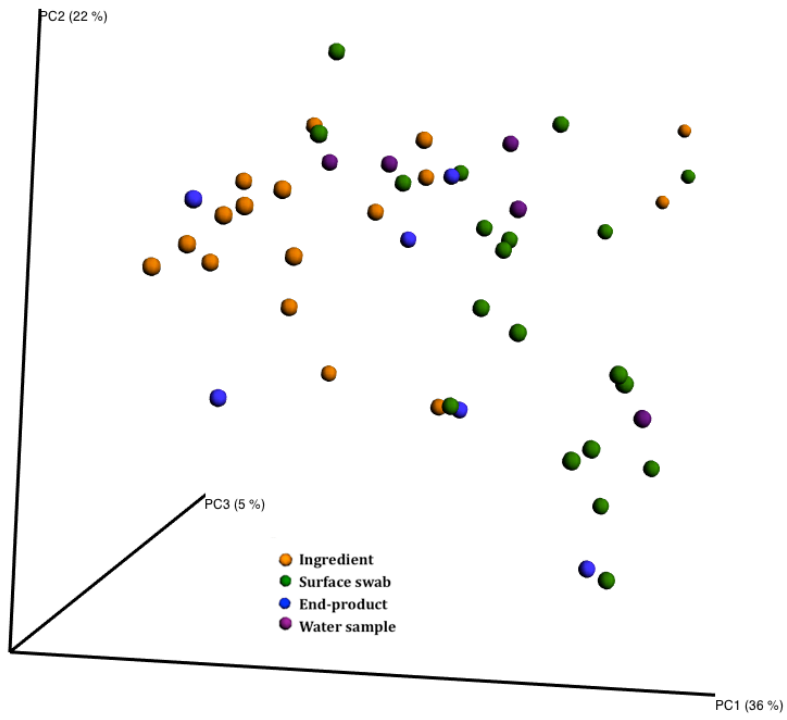

**Figure S1**

**Table S1**

Observed diversity and estimated sample coverage (Good's coverage) for 16S rRNA amplicons analyzed.

**Figure S1**

Principal Coordinates Analysis of Bray Curtis distances for the PICRUSt-obtained predicted metagenome data. Dots are color-coded as reported in the figure.
